# Supplementary material for: Overweight and its associated risk factors among urban school adolescents in Nepal: a cross-sectional study
Source: PubMed Central journal article supplement — BMJ Open. 2016 May 20;6(5):e010335. doi: 10.1136/bmjopen-2015-010335 (PMC4885275; doi:10.1136/bmjopen-2015-010335), 2016-05-20
Supplement: bmjopen-2015-010335supp.pdf [file bmjopen-2015-010335supp.pdf]

**OVERWEIGHT AND ITS ASSOCIATED RISK FACTORS AMONG URBAN SCHOOL ADOLESCENTS IN NEPAL**

**Instruction:**

Please

- read each question carefully and respond appropriately
- feel free to ask if you don't understand/confuse about any question
- tick  (✓) or write answer in the box accordingly

|                              |          |                                |  |
|------------------------------|----------|--------------------------------|--|
| <b>Form No.</b>              |          | <b>Date of data collection</b> |  |
| <b>Weight of the student</b> | ..... Kg |                                |  |

| Q. No. | Questions                                                        | Response and Code                                                                                                                                                                                                                                                                                                                                                                                                                                                                                  |
|--------|------------------------------------------------------------------|----------------------------------------------------------------------------------------------------------------------------------------------------------------------------------------------------------------------------------------------------------------------------------------------------------------------------------------------------------------------------------------------------------------------------------------------------------------------------------------------------|
| 1      | What is your name? (Optional)                                    |                                                                                                                                                                                                                                                                                                                                                                                                                                                                                                    |
| 2      | What is your school's name?                                      |                                                                                                                                                                                                                                                                                                                                                                                                                                                                                                    |
| 3      | What is the type of your school?                                 | <input type="checkbox"/> 1. Government<br><input type="checkbox"/> 2. Private                                                                                                                                                                                                                                                                                                                                                                                                                      |
| 4      | What is your date of birth?                                      | Day ..... Month ..... Year ..... (AD)                                                                                                                                                                                                                                                                                                                                                                                                                                                              |
| 5      | Are you a male or female?                                        | <input type="checkbox"/> 1. Male <input type="checkbox"/> 2. female                                                                                                                                                                                                                                                                                                                                                                                                                                |
| 6      | What is your ethnicity?                                          | <input type="checkbox"/> 1. Dalits<br><input type="checkbox"/> 2. Disadvantaged Janajatis<br><input type="checkbox"/> 3. Disadvantaged Non Dalit Terai People<br><input type="checkbox"/> 4. Religious Minorities<br><input type="checkbox"/> 5. Advantaged Janajatis<br><input type="checkbox"/> 6. Upper Caste<br><input type="checkbox"/> 7. Others specify.....                                                                                                                                |
| 7      | What is the educational level of your mother?                    | <input type="checkbox"/> 1. Illiterate<br><input type="checkbox"/> 2. Literate<br><input type="checkbox"/> 3. Primary (1-5)<br><input type="checkbox"/> 4. Lower Secondary (6-8)<br><input type="checkbox"/> 5. Secondary (9-10)<br><input type="checkbox"/> 6. Higher Secondary (11-12)<br><input type="checkbox"/> 7. Bachelor and above<br><input type="checkbox"/> 8. Don't know                                                                                                               |
| 8      | What is the major occupation of your mother?                     | <input type="checkbox"/> 1. Housewife<br><input type="checkbox"/> 2. Agriculture<br><input type="checkbox"/> 3. Labor<br><input type="checkbox"/> 4. Business<br><input type="checkbox"/> 5. Government service<br><input type="checkbox"/> 6. Non-government service<br><input type="checkbox"/> 7. Foreign employee<br><input type="checkbox"/> 8. Student<br><input type="checkbox"/> 9. Unemployed<br><input type="checkbox"/> 10. Others (specify)<br><input type="checkbox"/> 11. Don't know |
| 9      | How many brothers and sisters you have?                          | ..... Brothers   ..... Sisters                                                                                                                                                                                                                                                                                                                                                                                                                                                                     |
| 10     | What is type of your family?                                     | <input type="checkbox"/> 1. Nuclear <input type="checkbox"/> 2. Joint<br><input type="checkbox"/> 3. Extended <input type="checkbox"/> 4. Others specify.....                                                                                                                                                                                                                                                                                                                                      |
| 11     | During last one week, how many hours you had watched TV per day? | <input type="checkbox"/> < 1hour/day<br><input type="checkbox"/> 1-2 hours/day                                                                                                                                                                                                                                                                                                                                                                                                                     |

|  |                                   |
|--|-----------------------------------|
|  | <input type="checkbox"/> > 2hours |
|--|-----------------------------------|

12. How many numbers of times you had consumed the following fruits in last one week?

| Fruits Name            | Not consumed             | Once per week            | 2-4 times per week       | 5-6 times per week       | > 6 times per week       |
|------------------------|--------------------------|--------------------------|--------------------------|--------------------------|--------------------------|
| Apple                  | <input type="checkbox"/> |
| Banana                 | <input type="checkbox"/> |
| Guava                  | <input type="checkbox"/> |
| Orange                 | <input type="checkbox"/> |
| Pomegranate            | <input type="checkbox"/> |
| Grapes                 | <input type="checkbox"/> |
| <b>Others, specify</b> |                          |                          |                          |                          |                          |
|                        |                          |                          |                          |                          |                          |
|                        |                          |                          |                          |                          |                          |
|                        |                          |                          |                          |                          |                          |
|                        |                          |                          |                          |                          |                          |
|                        |                          |                          |                          |                          |                          |

### SOCIOECONOMIC STATUS

| Q. No | Questions                                                        | Response and code                                                                                                                                                                                                                                                                                                                                                                                                                                                                                                                                                                                                                                                                                                                                                                                                                                                                                                                                                                                                                                                                                                                                                                                                                                                                                                                                                                                                                                                                                                                                                                                                                                                                |
|-------|------------------------------------------------------------------|----------------------------------------------------------------------------------------------------------------------------------------------------------------------------------------------------------------------------------------------------------------------------------------------------------------------------------------------------------------------------------------------------------------------------------------------------------------------------------------------------------------------------------------------------------------------------------------------------------------------------------------------------------------------------------------------------------------------------------------------------------------------------------------------------------------------------------------------------------------------------------------------------------------------------------------------------------------------------------------------------------------------------------------------------------------------------------------------------------------------------------------------------------------------------------------------------------------------------------------------------------------------------------------------------------------------------------------------------------------------------------------------------------------------------------------------------------------------------------------------------------------------------------------------------------------------------------------------------------------------------------------------------------------------------------|
| 13    | Do you have your own home?                                       | <input type="checkbox"/> 1. Yes <input type="checkbox"/> 0. No                                                                                                                                                                                                                                                                                                                                                                                                                                                                                                                                                                                                                                                                                                                                                                                                                                                                                                                                                                                                                                                                                                                                                                                                                                                                                                                                                                                                                                                                                                                                                                                                                   |
| 14    | Are you living in your own home or rented house?                 | <input type="checkbox"/> 1. Own <input type="checkbox"/> 2. Rented<br><input type="checkbox"/> 3. Others specify.....                                                                                                                                                                                                                                                                                                                                                                                                                                                                                                                                                                                                                                                                                                                                                                                                                                                                                                                                                                                                                                                                                                                                                                                                                                                                                                                                                                                                                                                                                                                                                            |
| 15    | Tick the items which you have at your home/house                 | <ul style="list-style-type: none"> <li>• Electricity                    <input type="checkbox"/> 1. Yes <input type="checkbox"/> 0. No</li> <li>• Radio                            <input type="checkbox"/> 1. Yes <input type="checkbox"/> 0. No</li> <li>• Television                    <input type="checkbox"/> 1. Yes <input type="checkbox"/> 0. No</li> <li>• Mobile phone                <input type="checkbox"/> 1. Yes <input type="checkbox"/> 0. No</li> <li>• Telephone                    <input type="checkbox"/> 1. Yes <input type="checkbox"/> 0. No</li> <li>• Refrigerator                 <input type="checkbox"/> 1. Yes <input type="checkbox"/> 0. No</li> <li>• Bed                                <input type="checkbox"/> 1. Yes <input type="checkbox"/> 0. No</li> <li>• Sofa                              <input type="checkbox"/> 1. Yes <input type="checkbox"/> 0. No</li> <li>• Cupboard                    <input type="checkbox"/> 1. Yes <input type="checkbox"/> 0. No</li> <li>• Computer                    <input type="checkbox"/> 1. Yes <input type="checkbox"/> 0. No</li> <li>• Table                            <input type="checkbox"/> 1. Yes <input type="checkbox"/> 0. No</li> <li>• Chair                            <input type="checkbox"/> 1. Yes <input type="checkbox"/> 0. No</li> <li>• Clock                           <input type="checkbox"/> 1. Yes <input type="checkbox"/> 0. No</li> <li>• Fan                                <input type="checkbox"/> 1. Yes <input type="checkbox"/> 0. No</li> <li>• Dhiki/Janto                 <input type="checkbox"/> 1. Yes <input type="checkbox"/> 0. No</li> </ul> |
| 21    | What type of fuel is used mainly for cooking at your home/house? | <input type="checkbox"/> 1. Electricity<br><input type="checkbox"/> 2. LPG<br><input type="checkbox"/> 3. Biogas<br><input type="checkbox"/> 4. Kerosene<br><input type="checkbox"/> 5. Wood<br><input type="checkbox"/> 6. Animal dung<br><input type="checkbox"/> 7. Other (specify).....                                                                                                                                                                                                                                                                                                                                                                                                                                                                                                                                                                                                                                                                                                                                                                                                                                                                                                                                                                                                                                                                                                                                                                                                                                                                                                                                                                                      |
| 22    | What is your house's roof mainly made of?                        | <input type="checkbox"/> 1. Thatched roof<br><input type="checkbox"/> 2. Galvanized sheet<br><input type="checkbox"/> 3. Ceramic stiles<br><input type="checkbox"/> 4. Cement<br><input type="checkbox"/> 5. Others, specify .....                                                                                                                                                                                                                                                                                                                                                                                                                                                                                                                                                                                                                                                                                                                                                                                                                                                                                                                                                                                                                                                                                                                                                                                                                                                                                                                                                                                                                                               |
| 23    | Does any member of the family own any agricultural land?         | <input type="checkbox"/> 1. Yes<br><input type="checkbox"/> 0. No                                                                                                                                                                                                                                                                                                                                                                                                                                                                                                                                                                                                                                                                                                                                                                                                                                                                                                                                                                                                                                                                                                                                                                                                                                                                                                                                                                                                                                                                                                                                                                                                                |
| 24    | How many bigha/katha of agricultural land your family own?       | ..... Bigha<br>..... Ropani<br><input type="checkbox"/> Don't know                                                                                                                                                                                                                                                                                                                                                                                                                                                                                                                                                                                                                                                                                                                                                                                                                                                                                                                                                                                                                                                                                                                                                                                                                                                                                                                                                                                                                                                                                                                                                                                                               |

|    |                                                                                                        |                                                                                                                                                                                                                                                                                                                                                                                                                                                                                           |
|----|--------------------------------------------------------------------------------------------------------|-------------------------------------------------------------------------------------------------------------------------------------------------------------------------------------------------------------------------------------------------------------------------------------------------------------------------------------------------------------------------------------------------------------------------------------------------------------------------------------------|
| 25 | Do you have any livestock, herds, other farm animals or poultry?                                       | <input type="checkbox"/> Yes<br><input type="checkbox"/> No                                                                                                                                                                                                                                                                                                                                                                                                                               |
| 26 | If yes, please specify which animal/s and how many.                                                    | Buffalo .....<br>Milk cows or bulls .....<br>Goats .....<br>Chickens .....<br>Ducks .....<br>Pigs .....<br>Others specify .....                                                                                                                                                                                                                                                                                                                                                           |
| 27 | Does anyone in the family own Bicycle/rickshaw, Motorcycle/ scooter, three-wheeler, Car, Bus or truck? | <ul style="list-style-type: none"> <li>• Bicycle/rickshaw      <input type="checkbox"/> Yes <input type="checkbox"/> No</li> <li>• Motorcycle/ scooter      <input type="checkbox"/> Yes <input type="checkbox"/> No</li> <li>• Three wheeler      <input type="checkbox"/> Yes <input type="checkbox"/> No</li> <li>• Car      <input type="checkbox"/> Yes <input type="checkbox"/> No</li> <li>• Bus or truck      <input type="checkbox"/> Yes <input type="checkbox"/> No</li> </ul> |

**Your responses are greatly appreciated. If you have any other comments, please mention below.**

---



---



---



---

**Thank you!!!**
