# Supplementary material for: Overweight and its associated risk factors among urban school adolescents in Nepal: a cross-sectional study
Source: PubMed Central journal article supplement — BMJ Open. 2016 May 20;6(5):e010335. doi: 10.1136/bmjopen-2015-010335 (PMC4885275; doi:10.1136/bmjopen-2015-010335), 2016-05-20
Supplement: bmjopen-2015-010335supp_tables.pdf [file bmjopen-2015-010335supp_tables.pdf]

Separate analysis in male and female

**Supplement Table 1: General characteristics of sampled adolescent students**

| Characteristics                                       | Both Sexes           |                          | Male (n=170)         |                          | Female (n=190)       |                        |
|-------------------------------------------------------|----------------------|--------------------------|----------------------|--------------------------|----------------------|------------------------|
|                                                       | Overweight<br>(n=44) | No Overweight<br>(n=316) | Overweight<br>(n=27) | No Overweight<br>(n=143) | Overweight<br>(n=17) | No Overweight<br>(173) |
|                                                       | No. (%)              | No. (%)                  | No. (%)              | No. (%)                  | No. (%)              | No. (%)                |
| <b>Age</b>                                            |                      |                          |                      |                          |                      |                        |
| 16-17 years                                           | 35 (13.1)            | 233 (86.9)               | 24 (18.2)            | 108 (81.8)               | 11 (8.1)             | 125 (91.9)             |
| 18-19 years                                           | 9 (9.8)              | 83 (90.2)                | 3 (7.9)              | 35 (92.1)                | 6 (11.1)             | 48 (88.9)              |
| <b>Ethnicity</b>                                      |                      |                          |                      |                          |                      |                        |
| Advantaged                                            | 32 (13.6)            | 203 (86.4)               | 22 (19.6)            | 90 (80.4)                | 10 (8.1)             | 113 (91.9)             |
| Relatively disadvantaged                              | 12 (9.6)             | 113 (90.4)               | 5 (8.6)              | 53 (91.4)                | 7 (10.4)             | 60 (89.6)              |
| <b>School type</b>                                    |                      |                          |                      |                          |                      |                        |
| Private                                               | 29 (16.1)            | 151 (83.9)               | 21 (20.2)            | 83 (79.8)                | 8 (10.5)             | 68 (89.5)              |
| Government                                            | 15 (8.3)             | 165 (91.7)               | 6 (9.1)              | 60 (90.9)                | 9 (7.9)              | 105 (92.1)             |
| <b>Mother's educational level</b>                     |                      |                          |                      |                          |                      |                        |
| Formal education                                      | 32 (14.2)            | 194 (85.8)               | 21 (18.4)            | 93 (81.6)                | 11 (9.8)             | 101 (90.2)             |
| No formal education                                   | 12 (9.0)             | 122 (91.0)               | 6 (10.7)             | 50 (89.3)                | 6 (7.7)              | 72 (92.3)              |
| <b>Mother's occupation</b>                            |                      |                          |                      |                          |                      |                        |
| Working outside home also/<br>Employed/ non-housewife | 27 (14.6)            | 158 (85.4)               | 19 (18.8)            | 82 (81.2)                | 8 (9.5)              | 76 (90.5)              |
| Unemployed/housewife                                  | 17 (9.7)             | 158 (90.3)               | 8 (11.6)             | 61 (88.4)                | 9 (8.5)              | 97 (91.5)              |
| <b>Family type</b>                                    |                      |                          |                      |                          |                      |                        |
| Nuclear                                               | 34 (13.9)            | 210 (86.1)               | 21 (19.3)            | 88 (80.7)                | 17 (8.9)             | 173 (91.1)             |
| Extended/joint                                        | 10 (8.6)             | 106 (91.4)               | 6 (9.8)              | 55 (90.2)                | 4 (7.3)              | 51 (92.7)              |
| <b>No. of siblings</b>                                |                      |                          |                      |                          |                      |                        |
| Up to 2                                               | 39 (14.8)            | 225 (85.2)               | 24 (19.5)            | 99 (80.5)                | 15 (10.6)            | 126 (89.4)             |
| More than 2                                           | 5 (5.2)              | 91 (94.8)                | 3 (6.4)              | 44 (93.6)                | 2 (4.1)              | 47 (95.9)              |
| <b>Socio-economic status</b>                          |                      |                          |                      |                          |                      |                        |
| High (Rich)                                           | 28 (23.3)            | 92 (76.7)                | 18 (32.1)            | 38 (67.9)                | 10 (15.6)            | 54 (84.4)              |

|                           |           |            |           |            |           |            |
|---------------------------|-----------|------------|-----------|------------|-----------|------------|
| Middle                    | 8 (6.7)   | 112 (93.3) | 5 (8.3)   | 55 (91.7)  | 3 (5.0)   | 57 (95.0)  |
| Low (Poor)                | 8 (6.7)   | 112 (93.3) | 4 (7.4)   | 50 (90.6)  | 4 (6.1)   | 62 (93.9)  |
| <b>Watching TV</b>        |           |            |           |            |           |            |
| > 2 hours/day             | 26 (32.9) | 53 (67.1)  | 14 (41.2) | 20 (58.8)  | 12 (26.7) | 33 (73.3)  |
| ≤ 2 hours/day             | 18 (6.4)  | 263 (93.6) | 13 (9.6)  | 123 (90.4) | 5 (3.4)   | 140 (96.6) |
| <b>Fruits consumption</b> |           |            |           |            |           |            |
| ≤ 4 times/week            | 31 (16.8) | 153 (83.2) | 20 (20.6) | 77 (79.4)  | 11 (12.6) | 76 (87.4)  |
| > 4times/week             | 13 (7.4)  | 163 (92.6) | 7 (9.6)   | 66 (90.4)  | 6 (5.8)   | 97 (94.2)  |

SES: wealth index was computed using PCA, and the components included in wealth index were ownership of house, vehicles, animals, electronic goods (refrigerator, radio, TV, computer, fan), furniture (sofa, bed, cupboard, table, chair), mobile phone, telephone, housing characteristics and type of fuel for cooking.



|                              |                    |                   |                   |                   |                    |                  |                   |              |                    |                  |                    |                  |
|------------------------------|--------------------|-------------------|-------------------|-------------------|--------------------|------------------|-------------------|--------------|--------------------|------------------|--------------------|------------------|
| Nuclear                      | 1.7<br>(0.8-3.6)   | 0.154             | 1.4<br>(0.6-3.4)  | 0.445             | 2.2<br>(0.8-5.8)   | 0.11             | 2.8<br>(0.9-8.5)  | 0.06         | 1.4<br>(0.4-4.4)   | 0.61             | 1.1<br>(0.3-4.7)   | 0.86             |
| Extended/joint               | 1                  |                   | 1                 |                   | 1                  |                  | 1                 |              | 1                  |                  | 1                  |                  |
| <b>No. of siblings</b>       |                    |                   |                   |                   |                    |                  |                   |              |                    |                  |                    |                  |
| Up to 2                      | 3.2<br>(1.2-8.3)   | <b>0.019*</b>     | 1.8<br>(0.6-5.6)  | 0.097             | 3.5<br>(1.01-12.4) | <b>0.047</b>     | 1.7<br>(0.4-7.3)  | 0.47         | 2.8<br>(0.6-12.7)  | 0.18             | 2.0<br>(0.3-11.7)  | 0.43             |
| More than 2                  | 1                  |                   | 1                 |                   | 1                  |                  | 1                 |              | 1                  |                  | 1                  |                  |
| <b>Socio-economic status</b> |                    |                   |                   |                   |                    |                  |                   |              |                    |                  |                    |                  |
| High (Rich)                  | 4.3<br>(1.9-9.8)   | <b>&lt;0.001*</b> | 4.8<br>(1.4-16.7) | <b>0.018*</b>     | 5.9<br>(1.8-18.9)  | <b>0.003</b>     | 6.0<br>(1.7-21.6) | <b>.006</b>  | 2.9<br>(0.8-9.7)   | 0.09             | 4.3<br>(1.1-16.7)  | <b>0.036</b>     |
| Middle                       | 1.0<br>(0.4-2.8)   | 1.00              | 0.9<br>(0.3-3.2)  | 0.912             | 1.1<br>(0.3-4.5)   | 0.855            | 1.2<br>(0.3-5.2)  | 0.76         | 0.8<br>(0.2-3.8)   | 0.79             | 1.2<br>(0.2-6.4)   | 0.797            |
| Low (Poor)                   | 1                  |                   | 1                 |                   | 1                  |                  | 1                 |              | 1                  |                  | 1                  |                  |
| <b>Watching TV</b>           |                    |                   |                   |                   |                    |                  |                   |              |                    |                  |                    |                  |
| > 2 hours/day                | 7.17<br>(3.7-14.0) | <b>&lt;0.001*</b> | 8.9<br>(3.9-20.1) | <b>&lt;0.001*</b> | 6.6<br>(2.7-16.1)  | <b>&lt;0.001</b> | 4.3<br>(1.6-11.6) | <b>0.004</b> | 10.2<br>(3.3-30.9) | <b>&lt;0.001</b> | 11.5<br>(3.6-37.2) | <b>&lt;0.001</b> |
| ≤ 2 hours/day                | 1                  |                   | 1                 |                   | 1                  |                  | 1                 |              | 1                  |                  | 1                  |                  |
| <b>Fruits consumption</b>    |                    |                   |                   |                   |                    |                  |                   |              |                    |                  |                    |                  |
| ≤ 4 times/week               | 2.5<br>(1.3-5.0)   | <b>0.008*</b>     | 3.13<br>(1.4-7.0) | <b>0.006*</b>     | 2.5<br>(0.97-6.1)  | <b>.057</b>      | 3.5<br>(1.2-10.0) | <b>0.022</b> | 2.3<br>(0.8-6.6)   | 0.11             | 3.7<br>(1.1-12.0)  | <b>0.031</b>     |
| > 4times/week                | 1                  |                   | 1                 |                   | 1                  |                  | 1                 |              | 1                  |                  | 1                  |                  |

Note: Adjusted for age, sex, ethnicity, school type, mother's educational level, mother's occupation, family type, number of siblings, socio-economic status, watching TV and fruits consumption

\*p-value <0.05
